# Supplementary material
Source: PubMed Central journal article supplement (PMC5450165)
Supplement: NIHMS860466-supplement-Supplemental.pdf [file NIHMS860466-supplement-Supplemental.pdf]

*Supporting information for:*

# Structural study of a flexible active site loop in human indoleamine 2,3-dioxygenase and its functional implications.

*Lucía Álvarez<sup>1,2</sup>, Ariel Lewis-Ballester<sup>3</sup>, Adrián Roitberg<sup>4</sup>, Darío A. Estrin<sup>1,2</sup>, Syun-Ru Yeh<sup>3</sup>,*

*Marcelo A. Marti<sup>\*,5,6</sup>, Luciana Capece<sup>\*,1,2</sup>*

<sup>1</sup>*Dto. de Química Inorgánica, Analítica y Química Física, Fac. de Ciencias Exactas y Naturales, Univ. de Buenos Aires, Buenos Aires, C1428EGA, Argentina.* <sup>2</sup>*INQUIMAE-CONICET, Buenos Aires, C1428EGA, Argentina,* <sup>3</sup>*Department of Physiology and Biophysics, Albert Einstein College of Medicine, 1300 Morris Park Avenue, New York, NY 10461, USA,* <sup>4</sup>*Department of Chemistry, Quantum Theory Project, 440 Leigh Hall, University of Florida, Gainesville, FL. 32611-7200, USA.* <sup>5</sup>*Dto. de Química Biológica Fac. de Ciencias Exactas y Naturales, Univ. de Buenos Aires, Buenos Aires, C1428EGA, Argentina* <sup>6</sup>*IQUIBICEN-CONICET, Buenos Aires, C1428EGA, Argentina.*

### ***1.1 JK-loop structural modeling***

The structural alignment between hIDO (PDB code 2D0T), xcTDO (PDB code: 2NW8) and PrnB (PDB code: 2X67) is shown in figure S1.

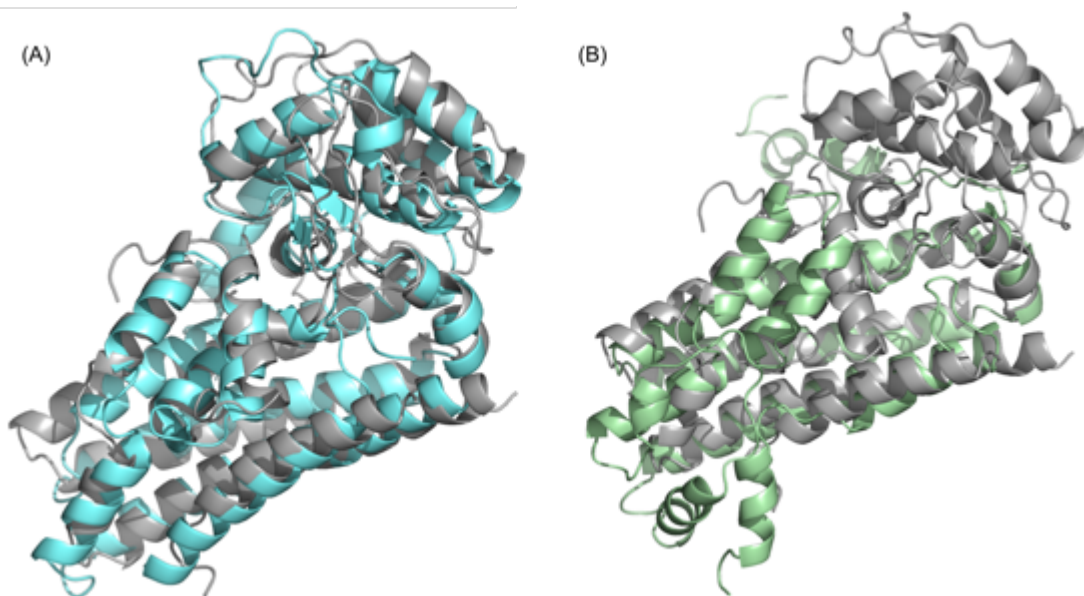

**Figure S1.** The hIDO crystal structure (2D0T) in gray aligned with a) the crystal structures of PrnB (PDB code: 2X67) in cyan and b) xcTDO (2NW8) in green.

Sequence comparison of hIDO, PrnB, and xcTDO.

|                    |     |                                                                                                                            |     |
|--------------------|-----|----------------------------------------------------------------------------------------------------------------------------|-----|
| <i>hIDO/1-403</i>  | 1   | ----- MAHAMENSWT I SKEYHIDEEVGFALPNPQENLPDFYNDWM                                                                           | 43  |
| <i>PrnB/1-361</i>  | 1   | ----- MERTLDRVG----- V                                                                                                     | 10  |
| <i>xcTDO/1-298</i> | 1   | MPVDKNLRDLEPGIHT- DLEGR LTYGGYLRLDQLLSAQQPL- - - SEPAHHEML                                                                 | 50  |
| <i>hIDO/1-403</i>  | 44  | FI AKHLPDL IESGQLRERVEKLNMLS IDHLTDHKSQ- RLARLVLCITMAYVWGK                                                                 | 97  |
| <i>PrnB/1-361</i>  | 11  | FAATHAAVAA- SDPLQARALVQLPGLNRNKDVPGLVGLLREFLPVRGLPSGWF                                                                     | 64  |
| <i>xcTDO/1-298</i> | 51  | FI IQHQTSEL- WLKLLAHELRAA I VHLQRDEVWQCRKVLARSKQVLRQLTEQWSV                                                                | 104 |
| <i>hIDO/1-403</i>  | 98  | ----- GHGD- VRKVLPRN IAVPYCQLSKKLELPP I LVYADCV                                                                            | 133 |
| <i>PrnB/1-361</i>  | 65  | VEAAAAMRD I GFFLGLSKRHGHEPAEVVP- GLEPVL L D LARATNLP P P R E T L L H V T                                                   | 118 |
| <i>xcTDO/1-298</i> | 105 | LET L T P S E Y M G F - - - - - R D V L G P S S G F - Q S L Q Y R Y I E F L L G N K - - - N P Q M L Q V F                  | 149 |
| <i>hIDO/1-403</i>  | 134 | LANWKKKDPNKP LTYENMDVLF SFRDGDCKSGFFLVSLLEIAAAS- - - - - A I K V                                                           | 183 |
| <i>PrnB/1-361</i>  | 119 | VWNPTAADAQRSY T - - - - - G L P D E A H L L E S V R I S M A A L E A A I A L T V E L                                        | 161 |
| <i>xcTDO/1-298</i> | 150 | AYDPAGQARLR- - - - -                                                                                                       | 160 |
| <i>hIDO/1-403</i>  | 184 | I P T V F K A M Q M Q E R D T L L K A L L E I A S C L E K A L Q V F - - - H Q I H D H V N P K A F F S V L R I              | 235 |
| <i>PrnB/1-361</i>  | 162 | FDVS- - - - - L R S P E F A Q R S D E L E A Y L Q K M V E S I - - - V Y A Y R F I S P Q V F Y D E L R P                    | 207 |
| <i>xcTDO/1-298</i> | 161 | - - - - - E V L E A P S L Y E - - - E F L R Y L A R F G H A I P Q Q Y Q A R D W T A A H V A D D T L R P                    | 204 |
| <i>hIDO/1-403</i>  | 236 | Y L S G W K G N P Q L S D G L V Y E G F W E D P K E F A G G S A G Q S S V F Q C F D V L L G I Q Q T A G G G H              | 290 |
| <i>PrnB/1-361</i>  | 208 | F- - - - - Y E P I R V G G Q S Y L G P G A V E M P L F V L E H V L W G S Q S D D - - Q T                                   | 245 |
| <i>xcTDO/1-298</i> | 205 | V- - - - - F E R I Y E N T D R Y W R E Y S - - - - -                                                                       | 221 |
| <i>hIDO/1-403</i>  | 291 | AAQFLQDMRRYMPPAHRNFLCSLESNP SVREFVL SKGDA- GLR- - - - - EAYD                                                               | 336 |
| <i>PrnB/1-361</i>  | 246 | YREFKETYLPYVLPAYRAVYARFSGEPALIDRALDEARAVGTRDEHVVRAGLTALE                                                                   | 300 |
| <i>xcTDO/1-298</i> | 222 | - - - - - L C - - - - - E - D L - - - - - V D V E                                                                          | 230 |
| <i>hIDO/1-403</i>  | 337 | ACVKALVSLRSYHLQIVTKYI L I P A <span style="border: 1px solid blue; padding: 2px;">SQQKENKT SEDP SKLEAKGTGGTDL</span> MN FL | 391 |
| <i>PrnB/1-361</i>  | 301 | RVFKVLLRFRAPHLKLAERAYEVGQS- GP- - - - - E T G S G G Y A P - S M L                                                          | 340 |
| <i>xcTDO/1-298</i> | 231 | TQFQ- L W R F - - R H M R T V M R V I G F - - - - - K R G T G G S S G V G F L                                              | 263 |
| <i>hIDO/1-403</i>  | 392 | KTVRSTTEK- - - - - S- - - - - L- - - - - LKEG                                                                              | 403 |
| <i>PrnB/1-361</i>  | 341 | GELLTLTYAAR- SRVRAA- - - - - LDES                                                                                          | 361 |
| <i>xcTDO/1-298</i> | 264 | QQALALTFFPELFDVRTSVGVDNRPPQGSADAGKR- - - - -                                                                               | 298 |

**Figure S2.** . Sequence alignment of hIDO, PrnB, and xcTDO. The GT(S)GG motif and the SKL and TSED phosphorylation site are highlighted in green and red, respectively.

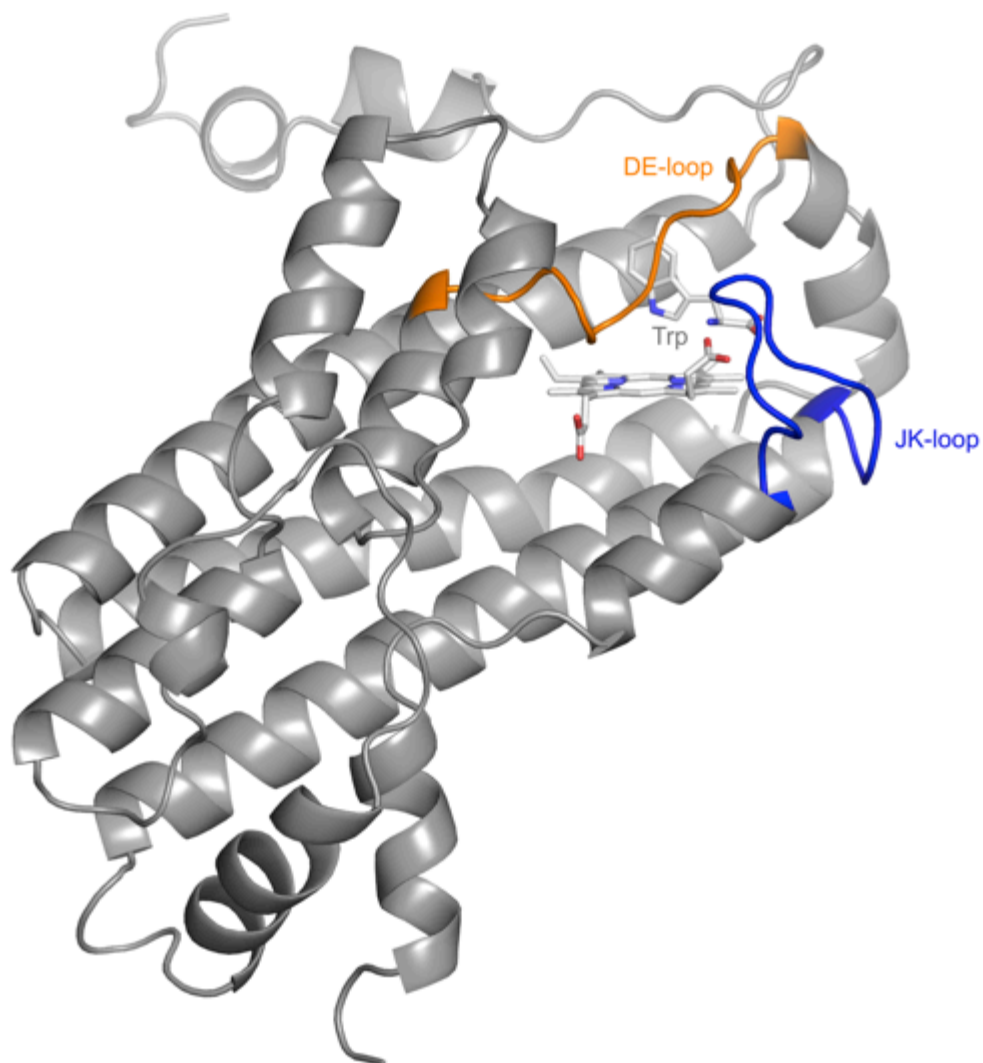

**Figure S3.** xcTDO structure, where the JK-Loop connecting the J-Helix and K-Helix is shown in blue. The Trp position resembles the conformation 1 (Cf1) in hIDO . The DE-loop is highlighted in orange.

## 1.2 JK-Loop Structure and Dynamics.

Table S1 shows the population of each JK-Loop<sup>C</sup> state for each of the three T-REMD simulations, SF-hIDO, Cf1-hIDO and Cf2-hIDO clustering based on the residues that belong to the JK-Loop<sup>C</sup>.

**Table S1.** Population of each JK-Loop<sup>C</sup> state in SF-hIDO, Cf1-hIDO or Cf2-hIDO trajectories.

| JK-Loop <sup>N</sup> state | State Population |          |          |
|----------------------------|------------------|----------|----------|
|                            | SF-hIDO          | Cf1-hIDO | Cf2-hIDO |
| <b>Closed</b>              | 96.6             | 99.9     | -        |
| <b>Intermediate</b>        | 1.8              | -        | 49.7     |
| <b>Open-extended</b>       | 1.6              | 0.1      | 50.3     |

### 3. Detailed structural and functional characterization of JK-Loop conformational states.

**Table S2.** Comparison of the interactions involving the Trp and the main residues of the active site in the wild type protein and the T379A mutant.

| Interactions           |                | Cf1 wt* | Cf1 T379A* |
|------------------------|----------------|---------|------------|
| <b>R231 HH12**</b>     | Trp OXT        | 99.9    | 62.2       |
| <b>R231 HH22**</b>     | Trp O          | 86.6    | 49.9       |
| <b>R231 HH21**</b>     | Trp O          | -       | 85.0       |
| <b>R231 HH22**</b>     | Trp OXT        | 7.2     | 42.3       |
| <b>R231 HH12**</b>     | Trp O          | 0.1     | 37.4       |
| <b>T/A379 H</b>        | Trp O          | 91.0    | 48.1       |
| <b>T379 OG1</b>        | Trp-NH3 group  | 63.3    | -          |
| <b>T/A 379 H</b>       | Trp- Oxt       | -       | 31.3       |
| <b>Heme group - O2</b> | Trp -NH3 group | 69.8    | 47.5       |
| <b>Gly 262 O</b>       | Trp- NH3 group | -       | 34.8       |

\*The values are expressed the occupancy percentage of hydrogen bonds averaged over simulation time,

\*\*The critical hydrogens in R231 are defined in Fig. S4.

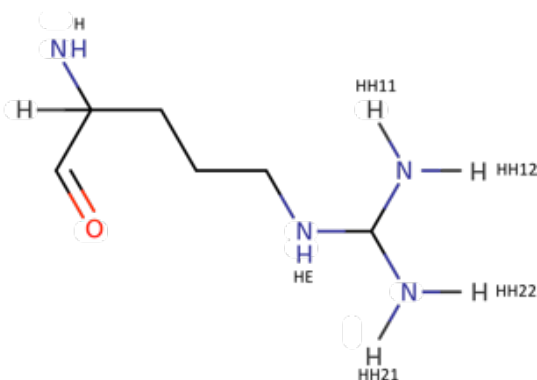

**Figure S4.** Naming system of the Hydrogen Atoms of the R231.
